# Supplementary material for: Interesting photoluminescence behaviour in graphitic carbon nitride quantum dots attached to PbCrO4 colloidal nanostructures
Source: Royal Society of Chemistry journal article supplement (doi:10.1039/d0nj03609a), 2020-01-01
Supplement: d0nj03609a1.pdf [file d0nj03609a1.pdf]

## Supporting Information

### **Interesting photoluminescence behaviour in graphitic carbon nitride quantum dots attached PbCrO<sub>4</sub> colloidal nanostructures**

*Tapas Kumar Mondal, Shyamal K. Saha\**

*School of Materials Sciences, Indian Association for the Cultivation of Science Jadavpur,  
Kolkata, 700032, India*

**\*E-mail:** [cnsks@iacs.res.in](mailto:cnsks@iacs.res.in)

### ❖ Quantum Yield (QY) calculations:

We have calculated relative fluorescence quantum yield of as-synthesized graphitic carbon nitride quantum dots using following expression

$$\Phi_s = (I_s/I_r) \times (A_r/A_s) \times (\eta_s^2/\eta_r^2) \times \Phi_r$$

Where r and s refer to the reference and the sample respectively,  $\Phi$  is the fluorescence quantum yield, I is the measured integrated fluorescence emission intensity, A is the optical density and  $\eta$  is the refractive index of the solvents. Here, we have use Quinine sulphate in 0.1M H<sub>2</sub>SO<sub>4</sub> ( $\Phi_r$  (QY) = 0.54 at 360 nm) as a standard.

So, as-synthesized CNQD gives 19.2 % QY.

### ❖ Detection limit calculation:

Lower detection limits of PbCrO<sub>4</sub> are calculated using the following expression,  $3\sigma/b$ , where  $\sigma$  is the standard deviation of blank and b is the slope of the calibration curve.

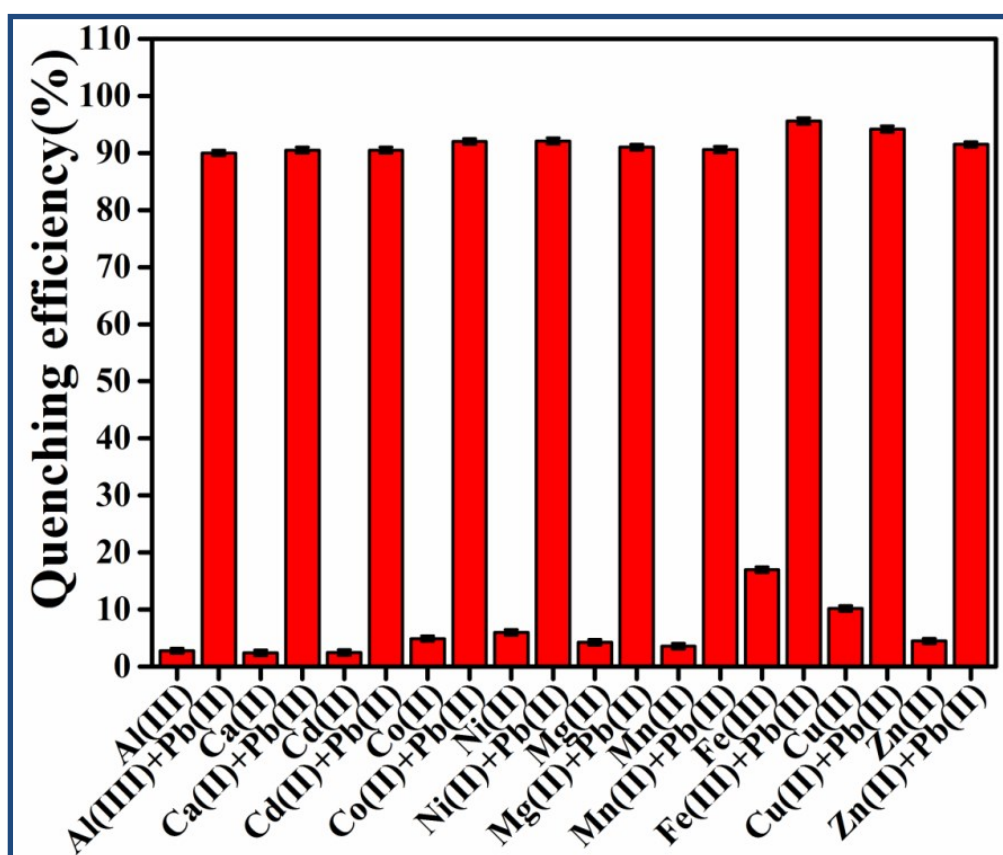

Figure S1 Selectivity of the formation of PbCrO<sub>4</sub> nano structures.

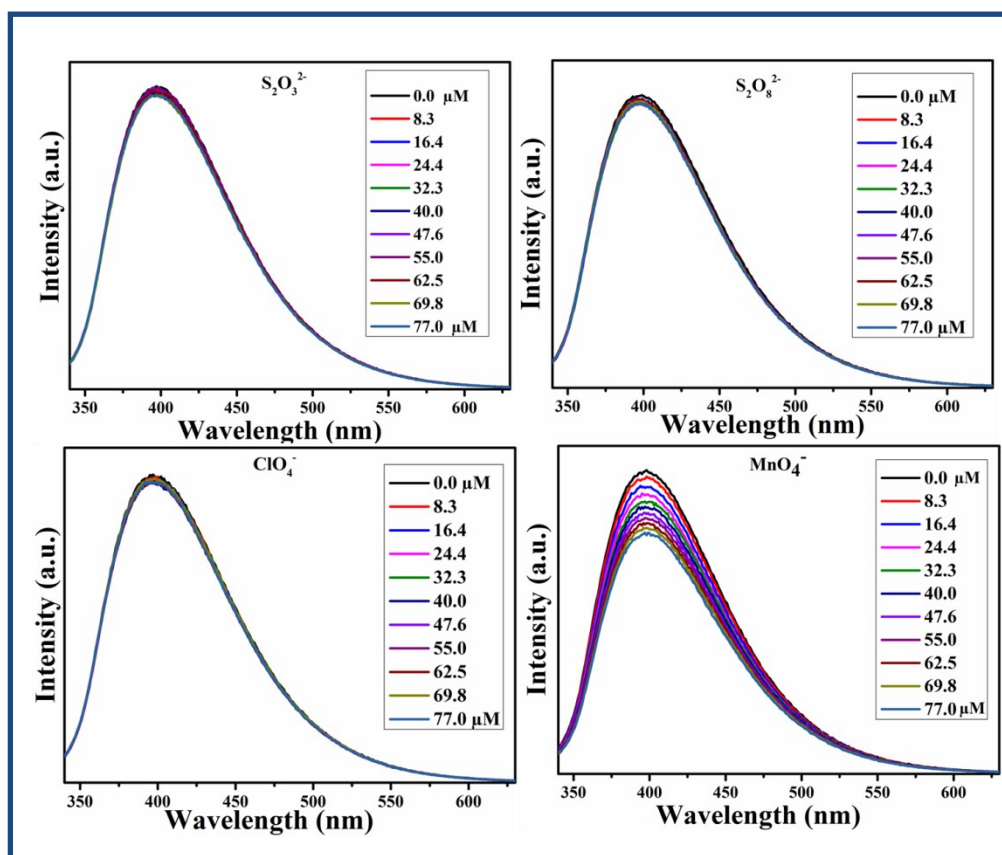

**Figure S2** Photoluminescence spectra of CNQD at 320nm excitation after gradual addition of different ions ( $S_2O_3^{2-}$ ,  $S_2O_8^{2-}$ ,  $ClO_4^-$ ,  $MnO_4^-$ )

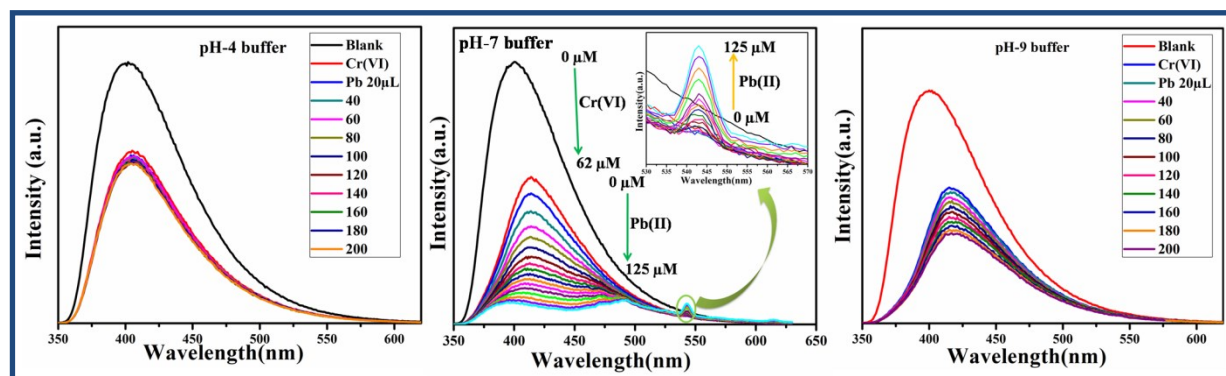

**Figure S3:** PL quenching spectra of CNQD at different pH medium after addition of  $Pb^{2+}$  ions.

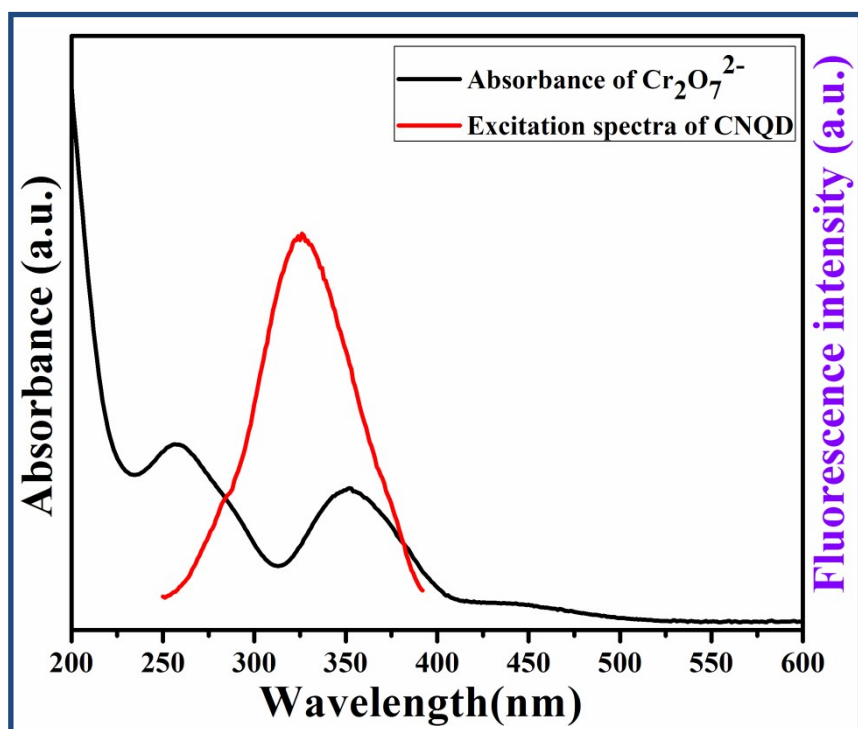

**Figure S4** Spectral overlap between absorption spectra of  $\text{Cr}_2\text{O}_7^{2-}$  and excitation spectra of CNQD.

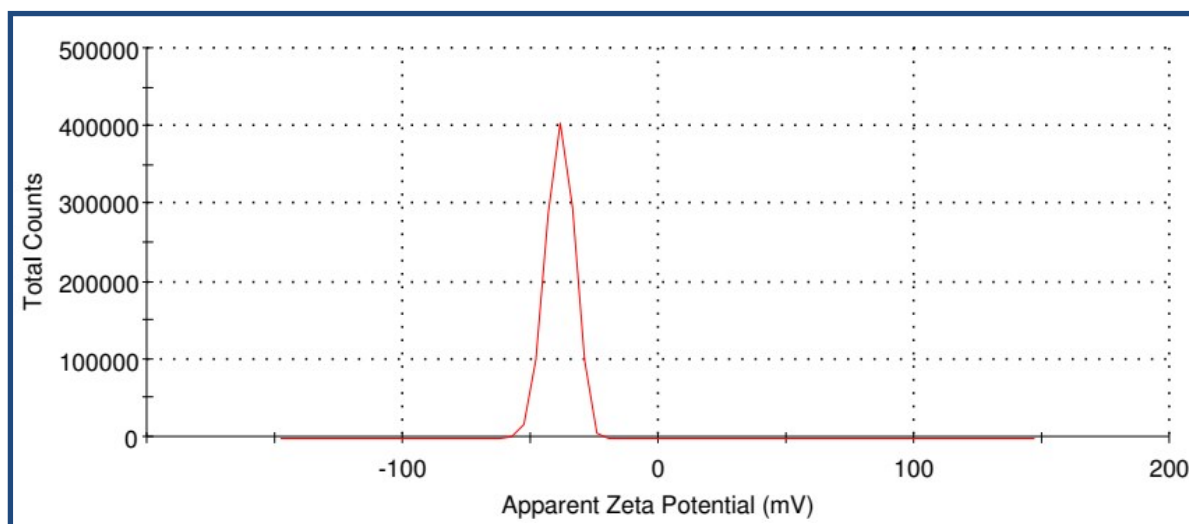

**Figure S5** Zeta potential of CNQD after addition of  $\text{Cr}_2\text{O}_7^{2-}$  ions.

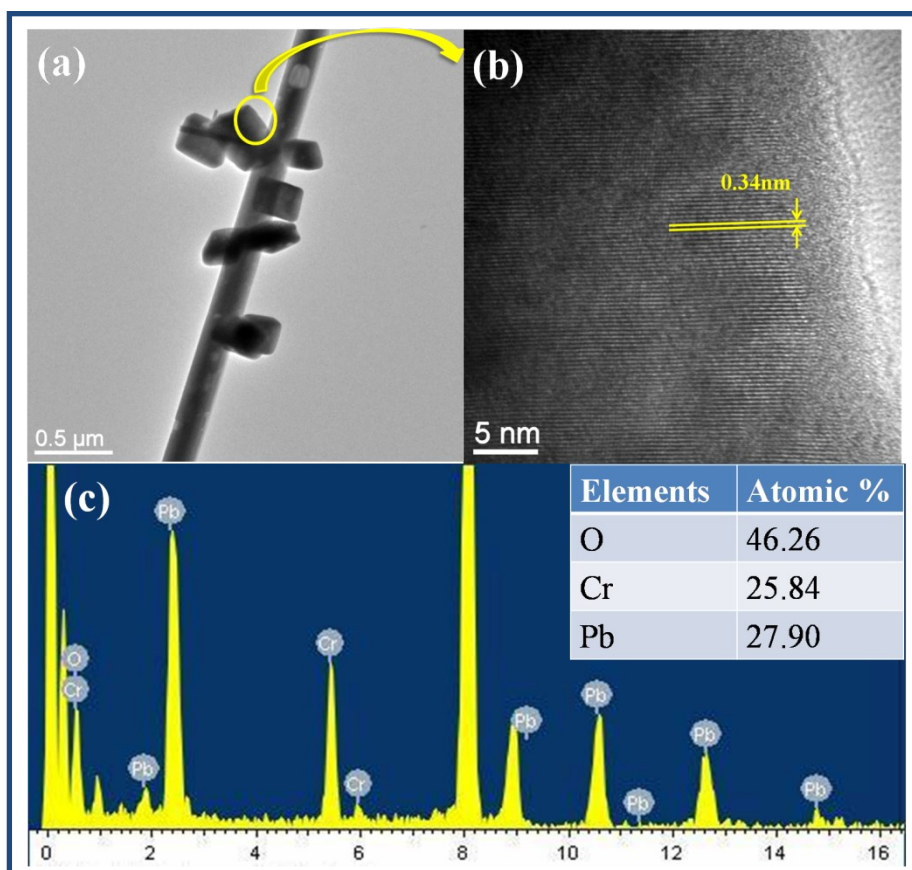

**Figure S6** (a) TEM image of  $\text{PbCrO}_4$  nanostructure; (b) HR-TEM image of  $\text{PbCrO}_4$  nanostructure; (c) EDX spectra of  $\text{PbCrO}_4$  nanostructure.

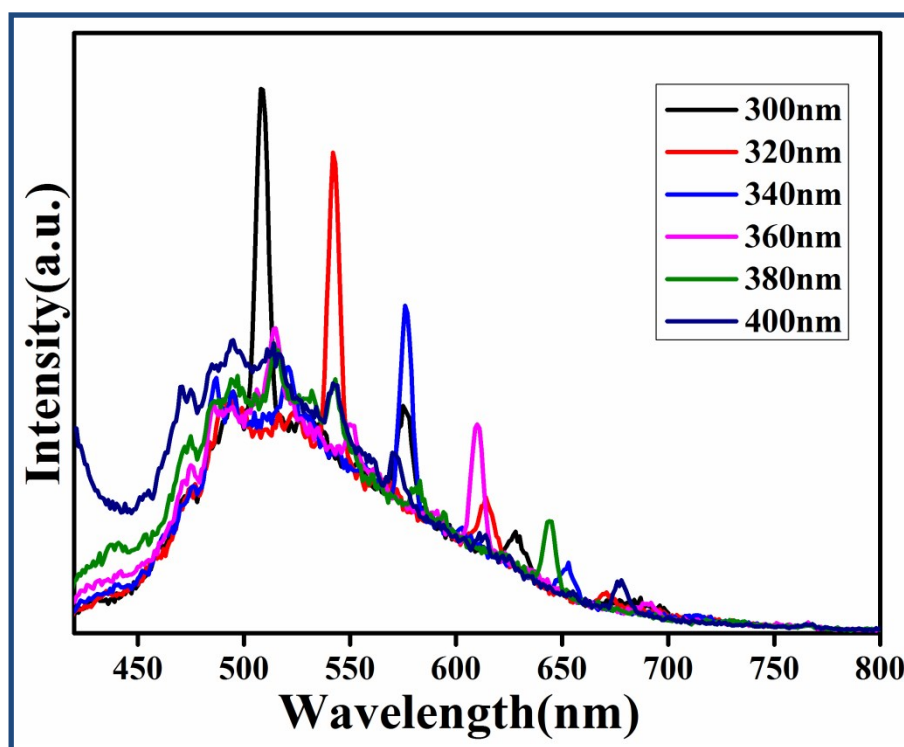

**Figure S7** PL spectra of  $\text{PbCrO}_4$  nano structure at different excitation wavelength.

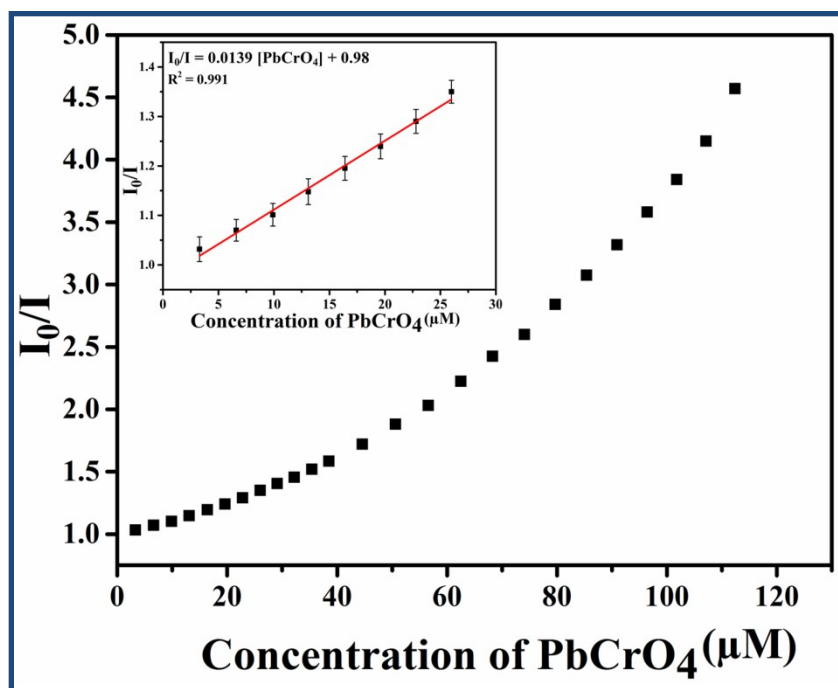

**Figure S8** Nonlinear curve of Stern-Volmer plot for yellow PbCrO<sub>4</sub> pigment, inset shows the fitting curve of the linearity of Stern-Volmer plot for PbCrO<sub>4</sub> at lower concentration.

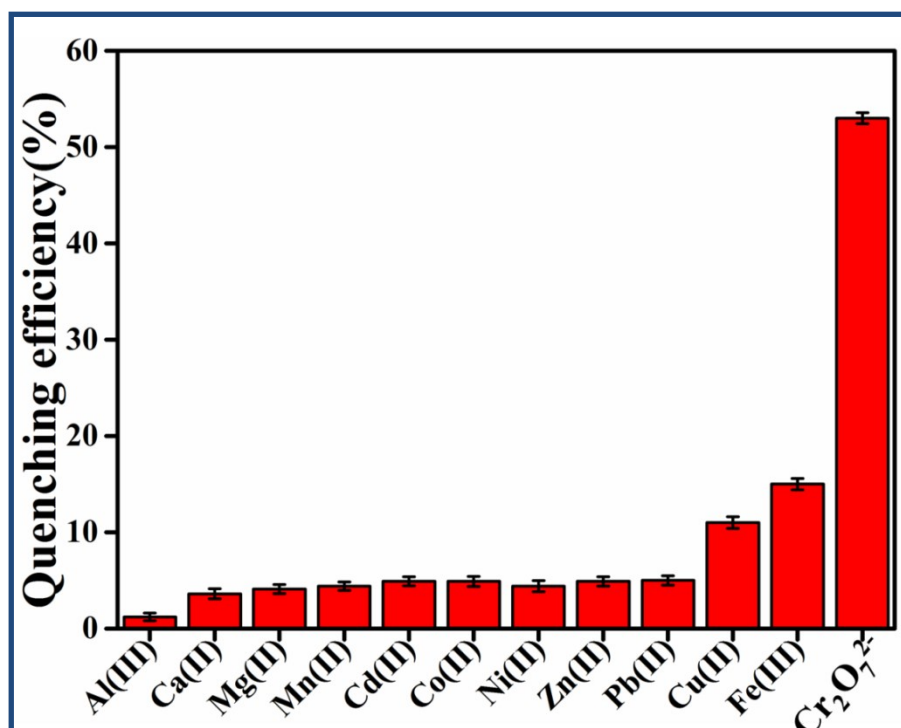

**Figure S9** PL quenching efficiency of different metal ions in pure CNQD solutions.

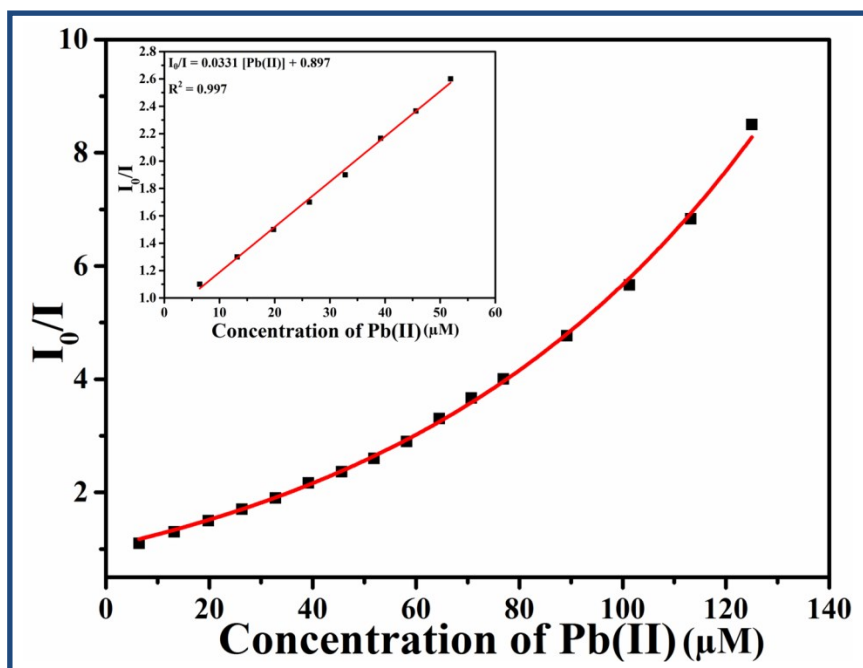

**Figure S10** Fitting Nonlinear curve of Stern-Volmer plot during in-situ formation of colloidal PbCrO<sub>4</sub>, inset shows the fitting curve of the linearity of Stern-Volmer plot for Pb(II) ions at lower concentration.

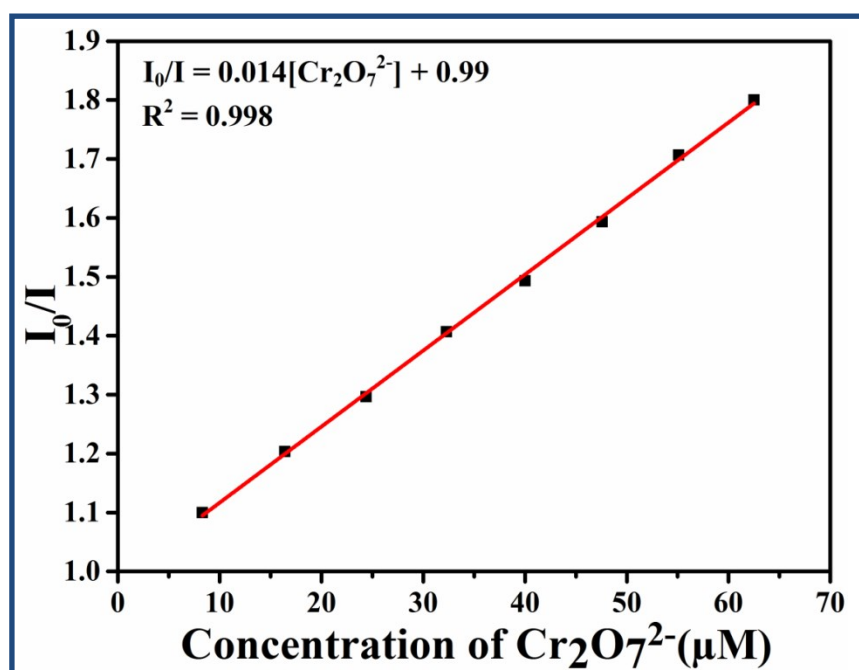

**Figure S11** Fitting Curve of Stern-Volmer plot for  $\text{Cr}_2\text{O}_7^{2-}$



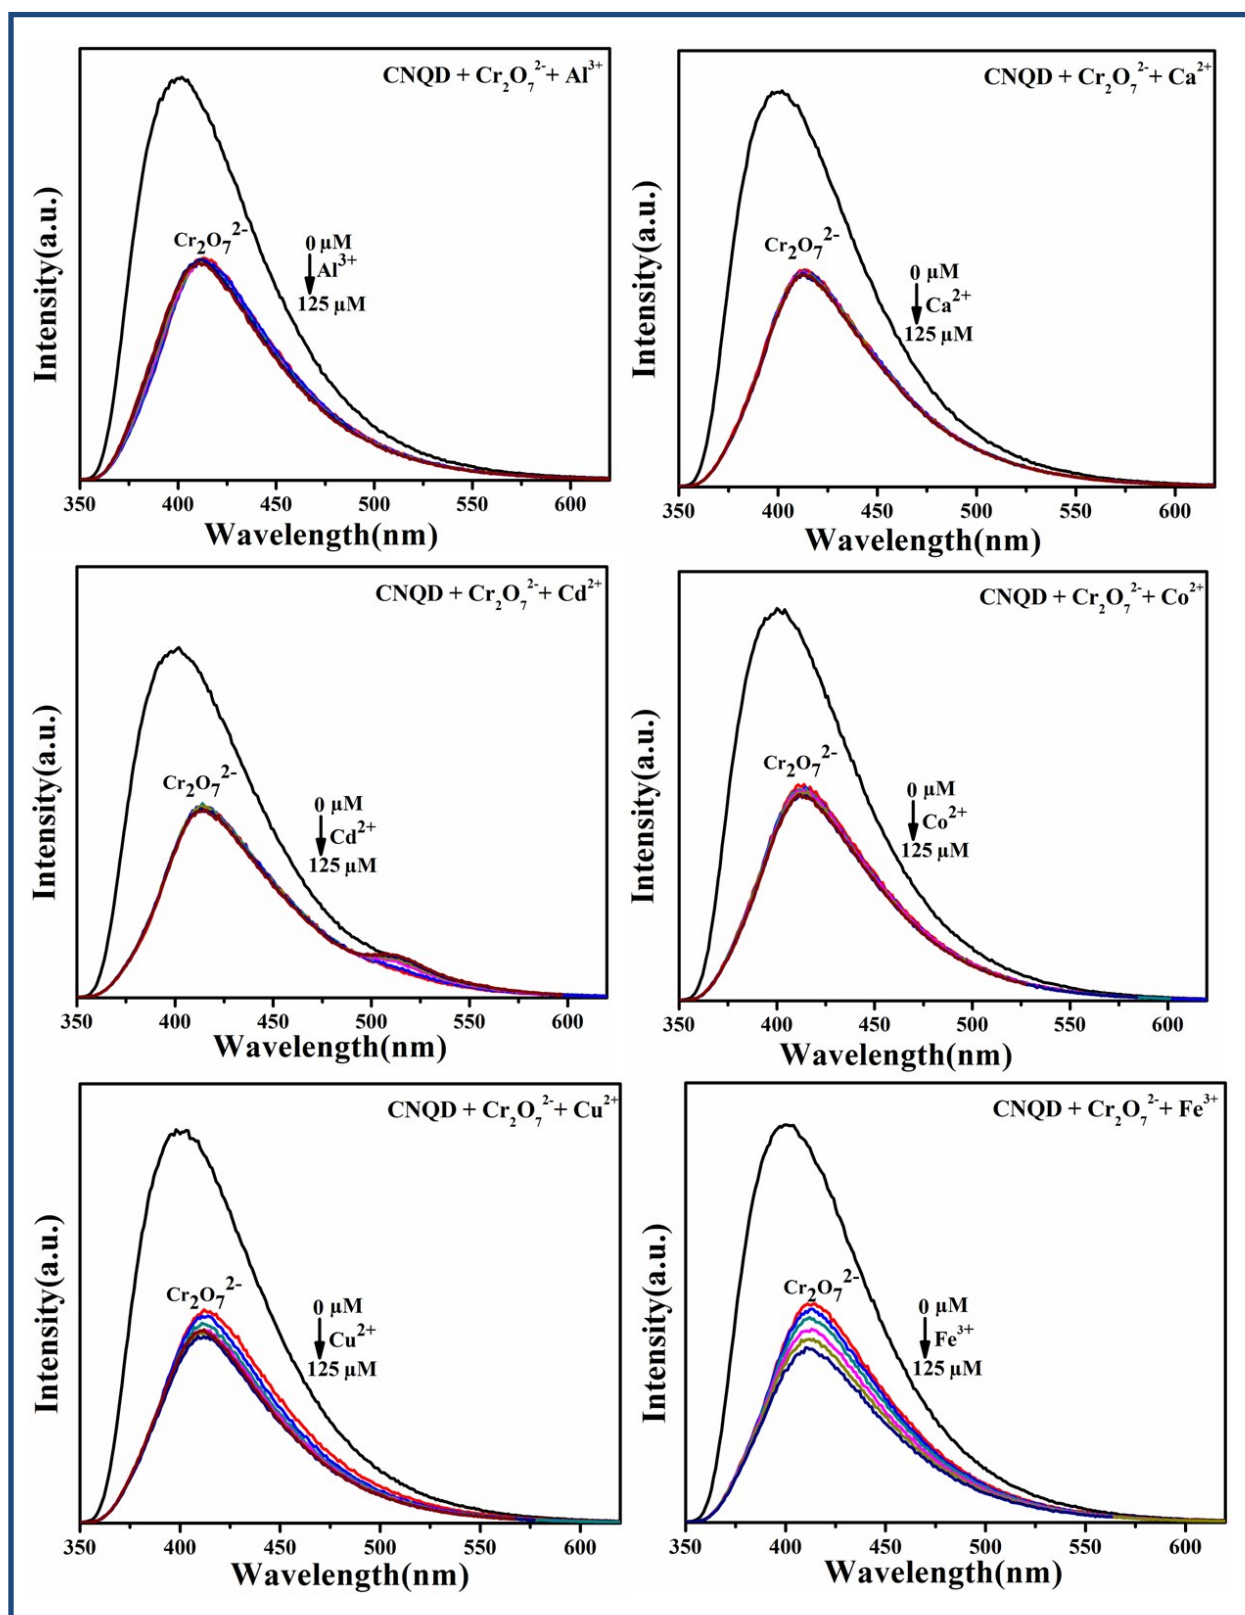

Figure S12 PL spectra of CNQD after gradual addition of different metal ions in presence of

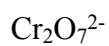



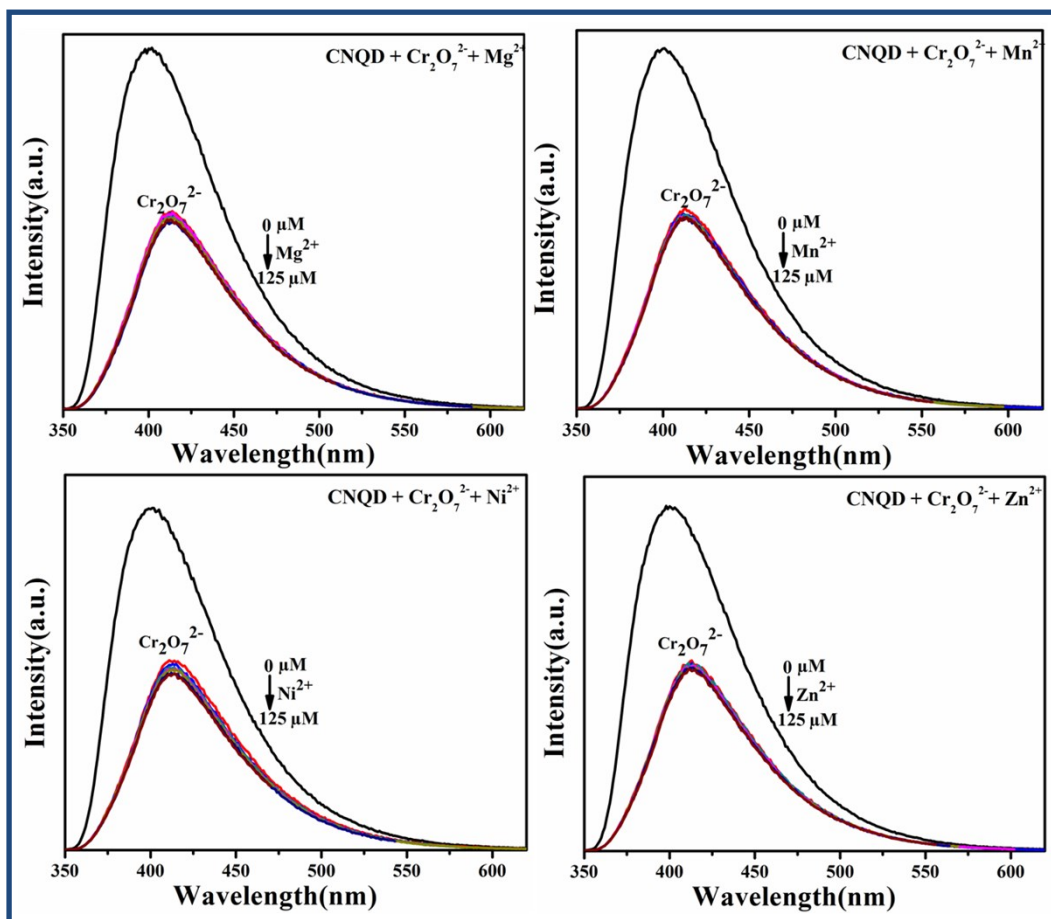

**Figure S13** PL spectra of CNQD after gradual addition of different metal ions in presence of  $\text{Cr}_2\text{O}_7^{2-}$
